# Supplementary material for: A novel fluorescent probe based on a triphenylamine derivative for the detection of HSO3−with high sensitivity and selectivity
Source: Royal Society of Chemistry journal article supplement (doi:10.1039/d1ay00800e), 2021-01-01
Supplement: d1ay00800e1.pdf [file d1ay00800e1.pdf]

## Supporting information

### **A novel fluorescent probe based on triphenylamine derivative for the detection of $\text{HSO}_3^-$ with high sensitivity and selectivity**

Yan Liu<sup>1</sup>, Liangqiang Wu<sup>1</sup>, Yaxing Dai<sup>1</sup>, Yapeng Li<sup>1</sup>, Shaolong Qi<sup>2</sup>, Jianshi Du<sup>2</sup>,  
Qingbiao Yang<sup>1,2,\*</sup>, Hai Xu<sup>1,\*</sup> and Yaoxian Li<sup>1</sup>

<sup>1</sup> College of Chemistry, Jilin University, Changchun 130021, Jilin, China

<sup>2</sup> Key Laboratory of Lymphatic Surgery Jilin Province, Engineering Laboratory of  
Lymphatic Surgery Jilin Province, China-Japan Union Hospital of Jilin University,  
Changchun 130031, Jilin, China

| <b>Table of Contents</b>                                                   |
|----------------------------------------------------------------------------|
| Fig. S1 High-resolution mass spectra of the probe TBQN.                    |
| Fig. S2 High-resolution mass spectra of the probe TBQN+ $\text{HSO}_3^-$ . |
| Fig. S3 $^1\text{H}$ NMR spectrum of probe TBQN in DMSO.                   |
| Fig. S4 $^{13}\text{C}$ NMR spectrum of probe TBQN in DMSO.                |
| Fig. S5 $^1\text{H}$ NMR spectrum of the probe TBQN+ $\text{HSO}_3^-$ .    |
| Fig. S6 The sketch map of cytotoxicity of probe TBQN.                      |

## Mass Spectrum SmartFormula Report

### Analysis Info

Analysis Name C:\Users\1111\Desktop\LY2\_P1-F-4\_01\_16797.d  
 Method lc-ms-hr-low.m  
 Sample Name LY2  
 Comment

Acquisition Date 2020/10/27 15:23:53  
 Operator zlwei  
 Instrument / Ser# micrOTOF-Q II 10351

### Acquisition Parameter

|             |          |                       |           |                  |           |
|-------------|----------|-----------------------|-----------|------------------|-----------|
| Source Type | ESI      | Ion Polarity          | Positive  | Set Nebulizer    | 0.6 Bar   |
| Focus       | Active   | Set Capillary         | 4500 V    | Set Dry Heater   | 200 °C    |
| Scan Begin  | 50 m/z   | Set End Plate Offset  | -500 V    | Set Dry Gas      | 8.0 l/min |
| Scan End    | 1200 m/z | Set Collision Cell RF | 100.0 Vpp | Set Divert Valve | Waste     |

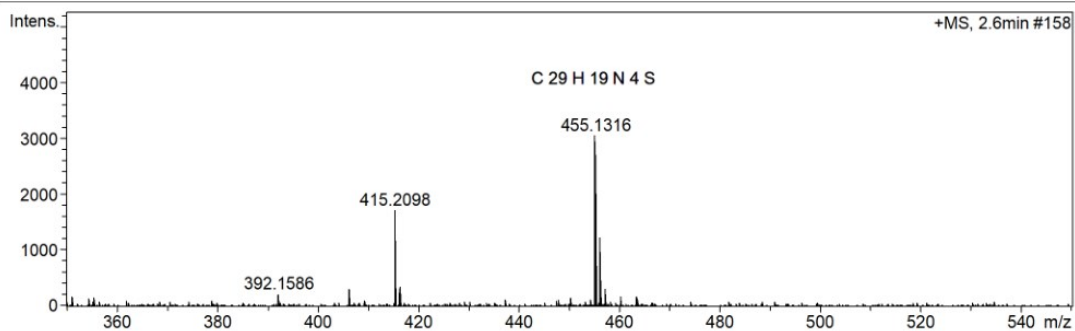

| Meas. m/z | # | Formula                                          | m/z      | err [ppm] | Mean err [ppm] | rdb  | N-Rule | ei% Conf | mSig ma | Std I  | Std Mean m/z | Std I VarNorm | Std m/z Diff | Std Com b Dev |
|-----------|---|--------------------------------------------------|----------|-----------|----------------|------|--------|----------|---------|--------|--------------|---------------|--------------|---------------|
| 455.1316  | 1 | C <sub>29</sub> H <sub>19</sub> N <sub>4</sub> S | 455.1325 | 2.0       | 2.8            | 22.5 | ok     | even     | 33.03   | 0.0460 | 0.0020       | 0.0177        | 0.0041       | 0.8427        |

Fig. S1. High-resolution mass spectra of the probe TBQN.

## Mass Spectrum SmartFormula Report

### Analysis Info

Analysis Name C:\Users\1111\Desktop\LY1\_P1-F-7\_01\_17955.d  
 Method lc-ms-hr-low.m  
 Sample Name LY1  
 Comment

Acquisition Date 2020/12/22 15:59:42  
 Operator zlwei  
 Instrument / Ser# micrOTOF-Q II 10351

### Acquisition Parameter

|             |          |                       |           |                  |           |
|-------------|----------|-----------------------|-----------|------------------|-----------|
| Source Type | ESI      | Ion Polarity          | Positive  | Set Nebulizer    | 0.6 Bar   |
| Focus       | Active   | Set Capillary         | 4500 V    | Set Dry Heater   | 200 °C    |
| Scan Begin  | 50 m/z   | Set End Plate Offset  | -500 V    | Set Dry Gas      | 8.0 l/min |
| Scan End    | 1200 m/z | Set Collision Cell RF | 100.0 Vpp | Set Divert Valve | Waste     |

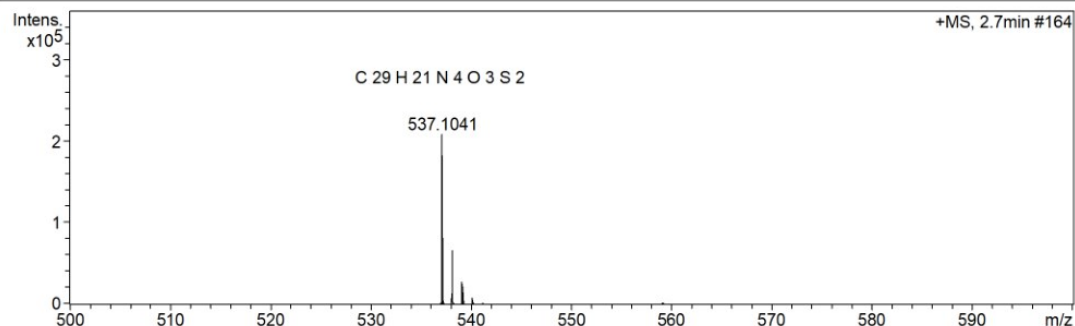

| Meas. m/z | # | Formula                                                                      | m/z      | err [ppm] | Mean err [ppm] | rdb  | N-Rule | ei% Conf | mSig ma | Std I  | Std Mean m/z | Std I VarNorm | Std m/z Diff | Std Com b Dev |
|-----------|---|------------------------------------------------------------------------------|----------|-----------|----------------|------|--------|----------|---------|--------|--------------|---------------|--------------|---------------|
| 537.1041  | 1 | C <sub>29</sub> H <sub>21</sub> N <sub>4</sub> O <sub>3</sub> S <sub>2</sub> | 537.1050 | 1.6       | 1.6            | 21.5 | ok     | even     | 16.91   | 0.0286 | 0.0012       | 0.0082        | 0.0019       | 0.8427        |

Fig. S2 High-resolution mass spectra of the probe TBQN+HSO<sub>3</sub><sup>-</sup>.

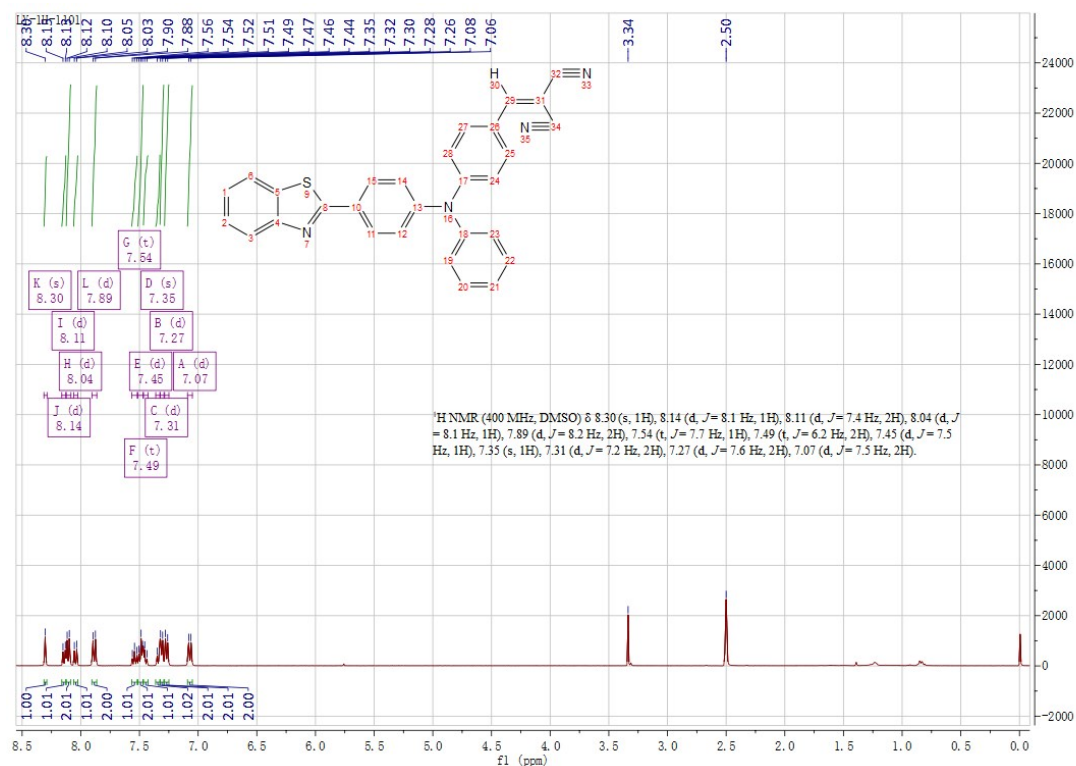

Fig. S3 <sup>1</sup>H NMR spectrum of probe TBQN in DMSO.

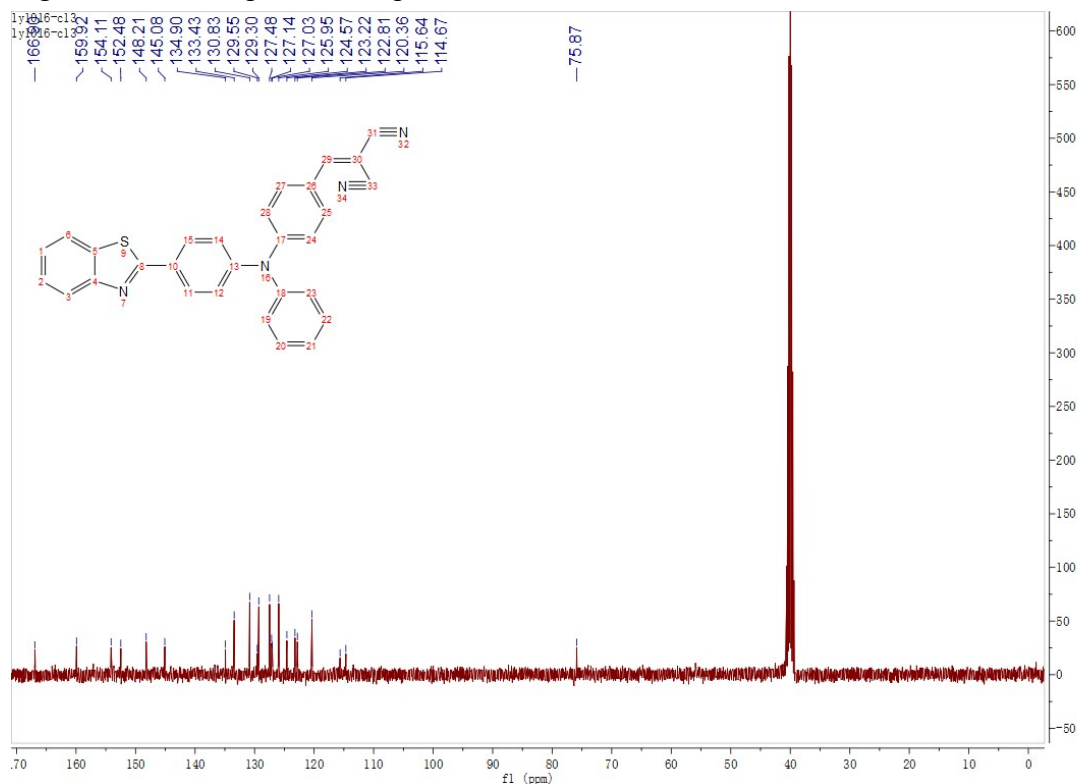

Fig. S4 <sup>13</sup>C NMR spectrum of probe TBQN in DMSO.

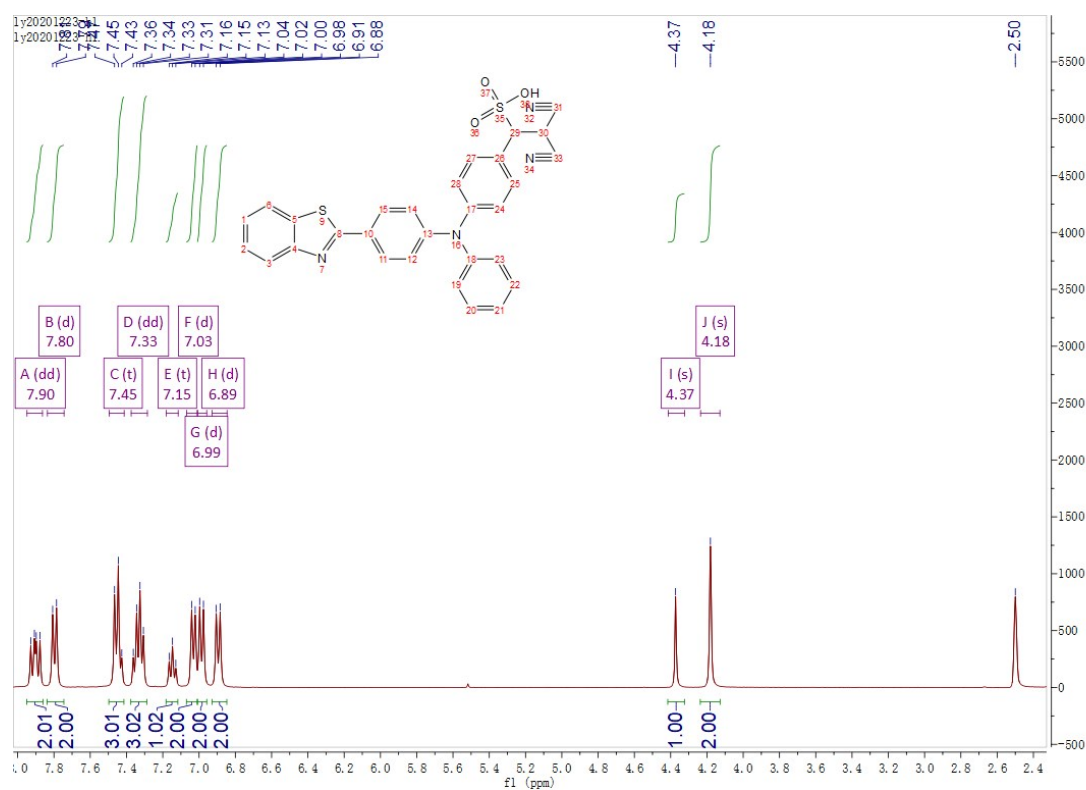

Fig. S5 <sup>1</sup>H NMR spectrum of the probe TBQN+HSO<sub>3</sub><sup>-</sup>.

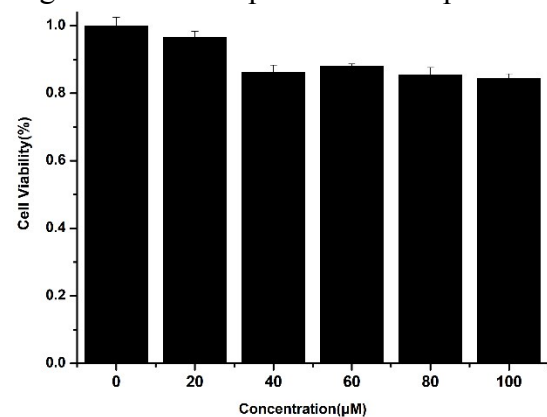

Fig. S6 The sketch map of cytotoxicity of probe TBQN.
